# Supplementary material for: Voting on Embryonic Stem Cell Research: Citizens More Supportive than Politicians
Source: PubMed Central journal article supplement (PMC5268364; doi:10.1371/journal.pone.0170656), 2017-01-26
Supplement: pone.0170656.s001.pdf [file pone.0170656.s001.pdf]

**S1 Table. Data description and sources.**

| <i>Variable</i>                  | <i>Description and sources</i>                                                                                                                                                                                       | <i>Mean</i> | <i>SD</i> |
|----------------------------------|----------------------------------------------------------------------------------------------------------------------------------------------------------------------------------------------------------------------|-------------|-----------|
| Accept research                  | Indicator variable: 1 if politician/citizen voted "yes" for stem cell research. Swiss Parliamentary Services and FORS Vox Survey.                                                                                    | 0.686       | 0.464     |
| Politician                       | Indicator variable: 1 if politician. Own construction.                                                                                                                                                               | 0.254       | 0.435     |
| Female                           | Indicator variable: 1 if female. Swiss Parliamentary Services and FORS Vox Survey.                                                                                                                                   | 0.449       | 0.498     |
| Age                              | Age of politician/citizen in years. Swiss Parliamentary Services and FORS Vox Survey.                                                                                                                                | 51.360      | 14.490    |
| Married                          | Indicator variable: 1 if married or partnership. Swiss Parliamentary Services and FORS Vox Survey.                                                                                                                   | 0.650       | 0.477     |
| Divorced                         | Indicator variable: 1 if divorced or separated. Swiss Parliamentary Services and FORS Vox Survey.                                                                                                                    | 0.079       | 0.270     |
| University education             | Indicator variable: If university education. Swiss Parliamentary Services and FORS Vox Survey.                                                                                                                       | 0.296       | 0.457     |
| Catholic                         | Indicator variable: 1 if catholic for citizen or catholic majority in canton for politician. BFS - Federal Office for Statistics and FORS Vox Survey.                                                                | 0.439       | 0.497     |
| Left party                       | Indicator variable: 1 if political affiliation of citizen left leaning (center of no affiliation is omitted category) or politician from left party. Swiss Parliamentary Services and FORS Vox Survey.               | 0.244       | 0.430     |
| Right party                      | Indicator variable: 1 if political affiliation of citizen right leaning (center of no affiliation is omitted category) or politician from right party. Swiss Parliamentary Services and FORS Vox Survey.             | 0.208       | 0.406     |
| Social democrats                 | Indicator variable: 1 if political affiliation of citizen/politician equals Social democrats (SP). Swiss Parliamentary Services and FORS Vox Survey.                                                                 | 0.241       | 0.428     |
| Liberals                         | Indicator variable: 1 if political affiliation of citizen/politician equals Liberals (FDP). Swiss Parliamentary Services and FORS Vox Survey.                                                                        | 0.160       | 0.367     |
| Conservative right               | Indicator variable: 1 if political affiliation of citizen/politician equals Conservative right (SVP). Swiss Parliamentary Services and FORS Vox Survey.                                                              | 0.136       | 0.343     |
| Greens                           | Indicator variable: 1 if political affiliation of citizen/politician equals Green party (GPS) or Green liberal party (GLP). Swiss Parliamentary Services and FORS Vox Survey.                                        | 0.089       | 0.412     |
| Other smaller party              | Indicator variable: 1 if political affiliation of citizen/politician does not equal Christian democrats, Social democrats, Liberals, Conservative right or Greens. Swiss Parliamentary Services and FORS Vox Survey. | 0.376       | 0.485     |
| No party affiliation declared    | Indicator variable: 1 if citizen declared not party affiliation. Politicians always have a party affiliation. FORS Vox Survey.                                                                                       | 0.307       | 0.462     |
| No church attendance             | Indicator variable: 1 if citizen reports no or low church attendance (not available for politicians). FORS Vox Survey.                                                                                               | 0.452       | 0.498     |
| Low income                       | Indicator variable: 1 if citizen is in low income tercile (not available for politicians). FORS Vox Survey.                                                                                                          | 0.329       | 0.470     |
| Impact country                   | Citizens evaluate referendum to have high (10) or low (1) impact on country (not available for politicians). FORS Vox Survey.                                                                                        | 7.391       | 2.581     |
| Number of interest groups        | Number of interest group affiliations of politician (not available for citizens). Swiss Parliamentary Services.                                                                                                      | 4.275       | 5.614     |
| Active years on National Council | Number of years in parliament at day of referendum (not available for citizens). Swiss Parliamentary Services.                                                                                                       | 4.881       | 4.513     |
| % Canton yes                     | Yes share at referendum in electoral district/canton (not relevant for citizens). Swissvotes Database.                                                                                                               | 0.663       | 0.080     |

**Notes:** Unweighted descriptive statistics for voters and politicians combined. Data sources indicated next to variable descriptions. The raw data and the R code to obtain the main results are provided as supplementary material.
